# Supplementary material for: Magnetic stability, Fermi surface topology, and spin-correlated dielectric response in monolayer 1T-CrTe2
Source: Royal Society of Chemistry journal article supplement (doi:10.1039/d4cp02724h), 2024-01-01
Supplement: d4cp02724h2.pdf [file d4cp02724h2.pdf]

## Supplemental Materials: Magnetic Stability, Fermi Surface Topology, and Spin-Correlated Dielectric Response in Monolayer 1T-CrTe<sub>2</sub>

### A. Energy Convergence With Respect To Sampling In The Unit Cell of Ferromagnetic CrTe<sub>2</sub>

Relaxation is performed on a unit cell until the force on each atom becomes less than 0.002 eV/Å and the total energy converges to within 10<sup>-8</sup> eV. A cutoff energy surface of 600 eV was used for the plane-wave-basis. A  $\Gamma$ -centered Monkhorst-Pack of  $13 \times 13 \times 1$  was used to sample the Brillouin zone for relaxation. After relaxation, the mesh was changed to be  $n \times n \times 1$  where:  $3 \leq n \leq 15$ . Colinear self-consistent calculations were performed using different  $n$  values to find a suitable mesh for the unit cell.

In the figure below, the ground energy of the unit cell with respect to the size of a mesh  $n \times n \times 1$  is shown. The value of  $n$  was allowed to go up to 25. Notice how the energy oscillates around the value  $E = -16.2625$  eV, especially for values where  $n \geq 10$ . This oscillatory behavior is another indicator that the chosen mesh is suitable for the calculation. The mesh sizes of the supercells were picked with this criterion in mind.

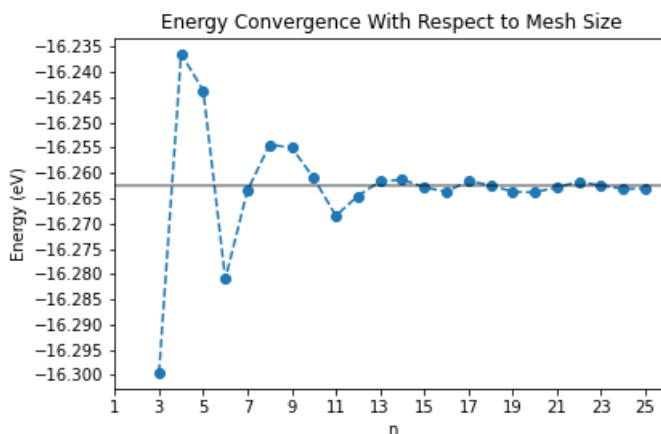

FIG. S1: Energy Convergence as a function of sampling points.

### B. Ground Energy Convergence With Respect to Cutoff Energy In The Unit Cell of Ferromagnetic CrTe<sub>2</sub>

The relaxed structure generated in the previous section was also used to perform colinear self-consistent calculations to test the convergence of the ground state energy against the energy cutoff surface used for the plane-wave-basis set. A mesh of  $13 \times 13 \times 1$  was used for the calculation. The self-consistent calculations were performed until the total energy difference reached 10<sup>-8</sup> eV.

| $E_{cutoff}(eV)$ | $E_{total}(eV)$ |
|------------------|-----------------|
| 400              | -16.260964      |
| 450              | -16.261668      |
| 500              | -16.262638      |
| 550              | -16.262849      |
| 600              | -16.262793      |
| 650              | -16.262816      |
| 700              | -16.263001      |

TABLE S1: Ground Energy Convergence with respect to energy cutoff

### C. Additional Supporting Figures

The ground energy of the unit cell converges up to the 5<sup>th</sup> significant digit when with an energy cutoff surface of at least 500 eV. Hence, we conclude that calculations performed using  $E_{cutoff} = 500$  eV or more are sufficient to model

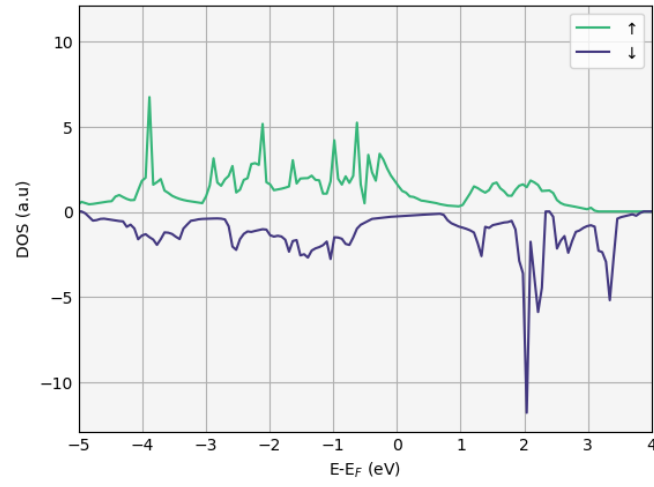

FIG. S2: DOS of the FM phase.

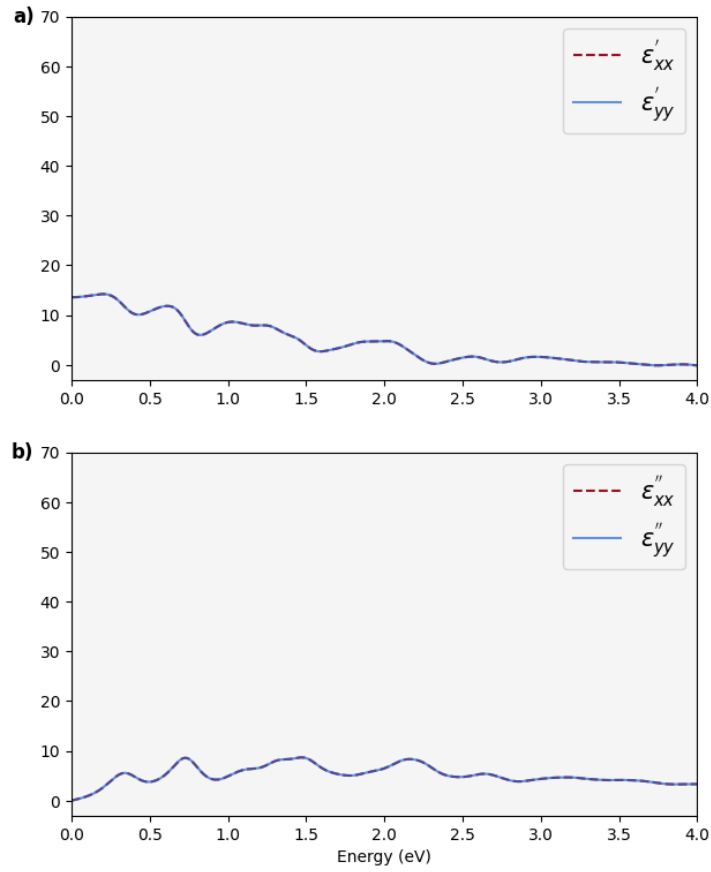

FIG. S3: Optical response of the FM unit cell along the  $x$  and  $y$  direction showing no anisotropy.

the behavior of the system.

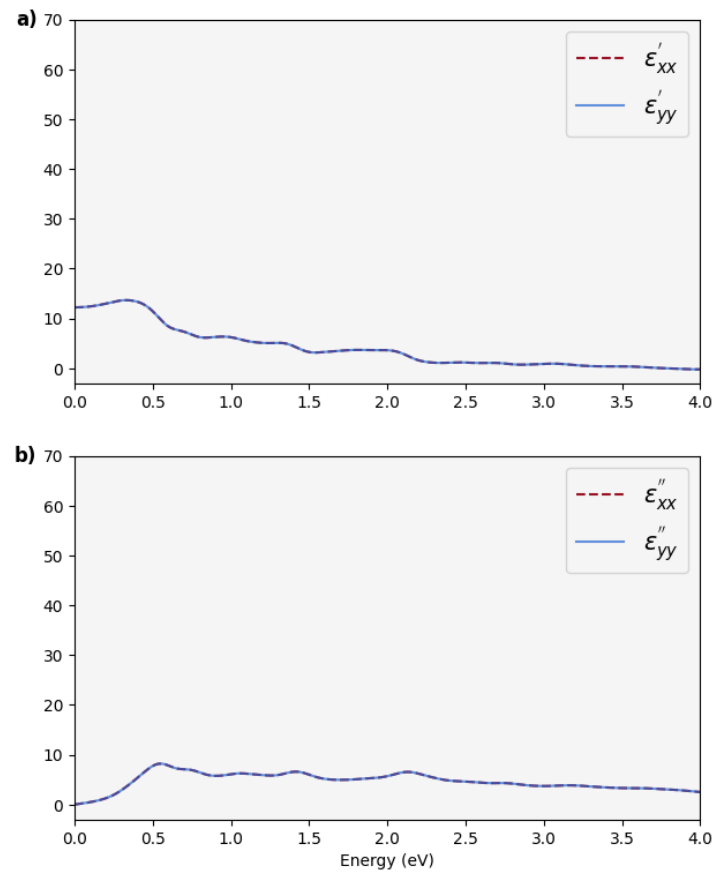

FIG. S4: Optical response of the FM-CDW supercell along the  $x$  and  $y$  direction showing no anisotropy.
